# Supplementary material
Source: Royal Society of Chemistry journal article supplement (doi:10.1039/d6nr00071a)
Supplement: d6nr00071a1.pdf [file d6nr00071a1.pdf]

*Supporting Information*

**Metastable Cubic Cu<sub>3</sub>SbS<sub>3</sub>: A Facile Solution-Phase Access to a Kinetic Polymorph**

Rittika Dhar<sup>1</sup>, Anil Kumar B. M.<sup>1</sup>, Pranav Negi<sup>2,3</sup>, Shuva Biswas,<sup>3</sup>  
Dirtha Sanyal<sup>4,5</sup> and Satya N. Guin<sup>1,\*</sup>

<sup>1</sup>*Department of Chemistry, Birla Institute of Technology and Science Pilani, Hyderabad Campus, Jawahar Nagar, Hyderabad 500078, India*

<sup>2</sup>*Department of Chemistry, Indian Institute of Science Education and Research Bhopal, Bhopal 462066, India*

<sup>3</sup>*New Chemistry Unit, Jawaharlal Nehru Centre for Advanced Scientific Research (JNCASR), Jakkur P.O., Bengaluru 560064, India*

<sup>4</sup>*Variable Energy Cyclotron Centre, 1/AF Bidhannagar, Kolkata 700064, India*

<sup>5</sup>*Homi Bhabha National Institute, Training School Complex, Anushakti Nagar, Mumbai 400094, India*

\*Email: [satyanarayan.g@hyderabad.bits-pilani.ac.in](mailto:satyanarayan.g@hyderabad.bits-pilani.ac.in)

## Experimental section

**Materials.** Nanocrystalline  $\text{Cu}_3\text{SbS}_3$  was synthesised using copper (II) nitrate trihydrate (99.5%, AR, SRL), antimony acetate (99.99%, Sigma-Aldrich), sulfur powder (reagent grade, Sigma-Aldrich), and 2-amino-ethan-1-ol (99+%, TCI). For the bulk  $\text{Cu}_3\text{SbS}_3$  synthesis, elemental precursors were used: copper shot (99.9999%, Alfa Aesar), antimony shot (99.9999%, Sigma-Aldrich), and sulfur powder (reagent grade, Sigma-Aldrich). All the chemicals were used as received without any further purification.

**Synthesis of nanocrystalline  $\text{Cu}_3\text{SbS}_3$ .** In a typical one-pot synthesis,  $\text{Cu}(\text{NO}_3)_2 \cdot 3\text{H}_2\text{O}$  (146.3 mg, 0.605 mmol),  $\text{Sb}(\text{CH}_3\text{COO})_3$  (60 mg, 0.200 mmol), and sulphur powder (19.4 mg, 0.604 mmol) were accurately weighed and transferred into a 25 mL three-neck round-bottom flask alongside 10 mL 2-Amino-1-ethanol. The reaction mixture was heated to 150 °C under normal atmospheric conditions with constant stirring and continued for 30 min. After cooling naturally to room temperature, the resulting dark brown precipitate was collected, washed several times with ethanol, and dried in a fume hood. To prepare the nanocrystalline  $\text{Cu}_3\text{SbS}_3$  for thermoelectric measurements, the powder was subjected to a hydrazine treatment. This involved vigorous stirring in a 3:1:4 volumetric mixture of chloroform, methanol, and hydrazine hydrate until precipitation occurred. The resulting product was then washed with ethanol and dried.

**Synthesis of bulk  $\text{Cu}_3\text{SbS}_3$ .** Stoichiometric amounts of high-purity elements Cu, Sb and sulfur were weighed and transferred to a quartz tube. The tube was flame sealed under high vacuum ( $10^{-5}$  Torr) and slowly heated to 900 °C over a period of 12 hours, soaked at this temperature for 48 hours, and finally quenched in ice-cold water.

**Powder X-ray Diffraction (PXRD).** A Rigaku Ultima IV diffractometer with Cu  $\text{K}\alpha_1$  radiation ( $\lambda = 1.5418 \text{ \AA}$ ) was used for the room temperature powder X-ray diffraction (PXRD) data collection of all the samples. Temperature-dependent PXRD was performed using a PANalytical Empyrean diffractometer with  $\text{CuK}\alpha$  radiation ( $\lambda = 1.5406 \text{ \AA}$ ). Rietveld refinement was performed using the FullProf package.<sup>1</sup> The obtained  $R_p$  and  $R_{wp}$  were 10.1 and 12.9, respectively.

**Field Emission Scanning Electron Microscopy (FESEM).** FESEM imaging was performed using the FEI-Apreo LoVac. Energy dispersive spectroscopy (EDX) was performed with the coupled Oxford X-Max EDX. Backscattered FESEM images were taken using an Apreo 2S, SEM, Thermo Scientific microscope.

**Transmission electron microscopy (TEM).** TEM imaging was done using a Jeol JEM F200 Multipurpose electron microscope.

**X-ray photoelectron spectroscopy (XPS).** XPS measurements were done using a Thermo Scientific K-Alpha (Al-K $\alpha$  monochromator, 1486.6 eV) XPS instrument.

**Differential Scanning Calorimetry (DSC).** DSC measurements were performed on a NETZSCH DSC 214 instrument from room temperature (RT) to 773 K at a heating rate of 5 K min<sup>-1</sup> under a nitrogen flow of 250 mL min<sup>-1</sup>.

**Band Gap Measurement.** The optical diffuse reflectance spectra of nanocrystalline and bulk Cu<sub>3</sub>SbS<sub>3</sub> were recorded using a Jasco UV-670 UV-vis-NIR spectrophotometer in the wavelength range of 300-2200 nm. The Kubelka-Munk equation:  $\alpha/S = (1 - R)^2/2R$ , where R denotes reflectance, while  $\alpha$  and  $S$  represent absorption and scattering coefficients, respectively, was used to calculate absorption ( $\alpha/S$ ) from the reflectance data. The optical band gap was measured from the plot of  $\alpha/S$  (a. u.) vs  $E$  (eV).

**Positron annihilation spectroscopy.** The positron annihilation lifetime (PAL) has been done by standard  $\gamma$ - $\gamma$  coincidence technique<sup>2,3</sup>. Two ultrafast BaF<sub>2</sub> scintillates (25 mm  $\times$  25 mm) coupled with two XP2020Q photomultiplier tubes have been used for the two g-ray detectors. The timing resolution of the positron lifetime spectrometer is about 220 ps, measured with a <sup>60</sup>Co gamma-emitting source (with the proper positron window settings). For the positron source a 8 micro-Curie <sup>22</sup>NaCl encapsulated in a 6-micron-thick mylar film has been used. The source component (self-annihilation of positrons inside the source) has been evaluated with a 99.9999 % pure Al single crystal. PATFITT computer programme has been used to deconvolute the positron lifetime spectrum. The positron lifetime components have been estimated with the proper source correction.

Coincidence Doppler broadening (CDB) studies have been carried out with two identical HPGe detectors (model number PGC 1216sp of DSG, Germany, of 12 % efficiency, having an energy resolution of 1.15 keV at 514 keV of <sup>85</sup>Sr). The high background suppressed (peak to background ratio  $\sim 10^5$ : 1) coincidence Doppler broadening spectra (using the  $\pm \Delta E$

selection)<sup>4</sup> have been recorded in a dual ADC-based multiparameter data acquisition system (Model number MPA-3 of FAST ComTec, Germany). For each CDB spectrum, a total of  $10^7$  coincidence counts has been recorded.

**Thermoelectric measurements.** Nanocrystalline  $\text{Cu}_3\text{SbS}_3$  was hot pressed into typical coins of 2mm thickness by employing graphite dies of 10 mm diameter under the axial pressure of 50 MPa for 30 minutes at 523 K. The Density of the hot-pressed sample was found to be  $\sim 90\%$  of the theoretical density ( $4.967 \text{ g cm}^{-3}$ ). Thermal conductivity ( $\kappa$ ) was calculated using the relation  $\kappa = DC_p\rho$ , where  $D$  is the thermal diffusivity,  $C_p$  is the specific heat capacity, and  $\rho$  is the density of the material. Thermal diffusivity was directly measured with NETZSCH LFA 457; Specific heat capacity was determined indirectly with the Pyroceram 9606 as a reference from NETZSCH LFA 457 in the temperature range of 303 to 723 K. Electrical resistivity and Seebeck coefficient were measured on Linseis LSR-3 under helium atmosphere in the temperature range of 336 to 725 K.

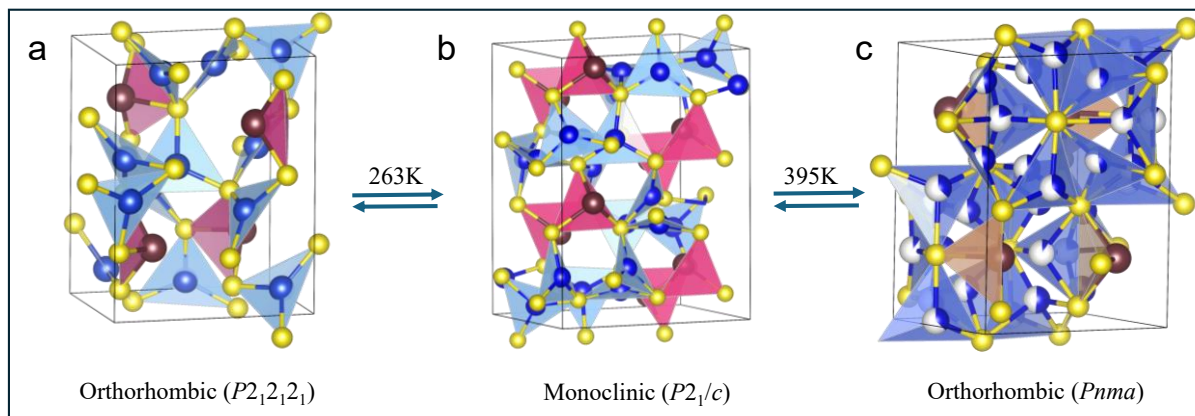

**Fig. S1** Temperature-dependent crystal structural evaluation of  $\text{Cu}_3\text{SbS}_3$ : (a) Wittichenite (space group  $P2_12_12_1$ ,  $<263$  K), (b) Skinnerite ( $P2_1/c$ , 263–395 K), and (c) orthorhombic  $\text{Cu}_3\text{SbS}_3$  ( $Pnma$ ,  $>395$  K).

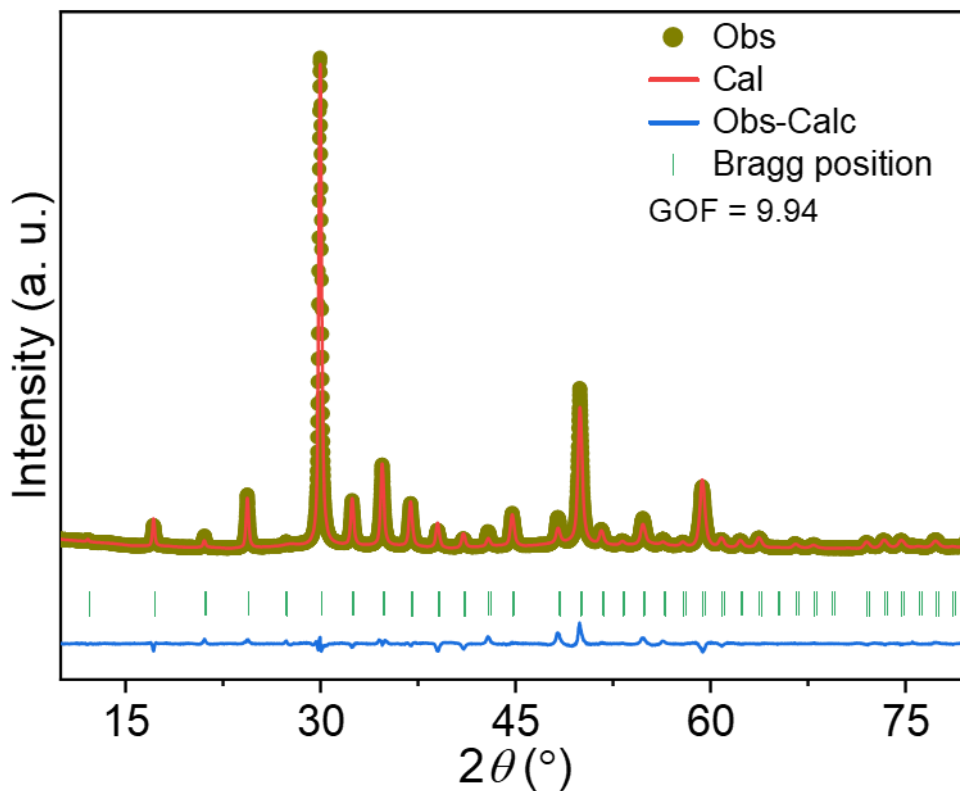

**Fig. S2** Rietveld refinement of the room temperature powder XRD pattern of as-synthesised nanocrystalline cubic  $\text{Cu}_3\text{SbS}_3$ . The refined lattice parameter is  $a = b = c = 10.320706 \text{ \AA}$ .

**Table S1** Structural parameters of the Rietveld refinement

| Atom | X       | Y       | Z       | $U_{\text{iso}}$ |
|------|---------|---------|---------|------------------|
| Cu1  | 0.25    | 0.5     | 0       | 0.00848          |
| Cu2  | 0.21922 | 0.00    | 0.0     | 0.01050          |
| Sb   | 0.26980 | 0.26980 | 0.26980 | 0.00751          |
| S    | 0.10628 | 0.10628 | 0.37285 | 0.00744          |

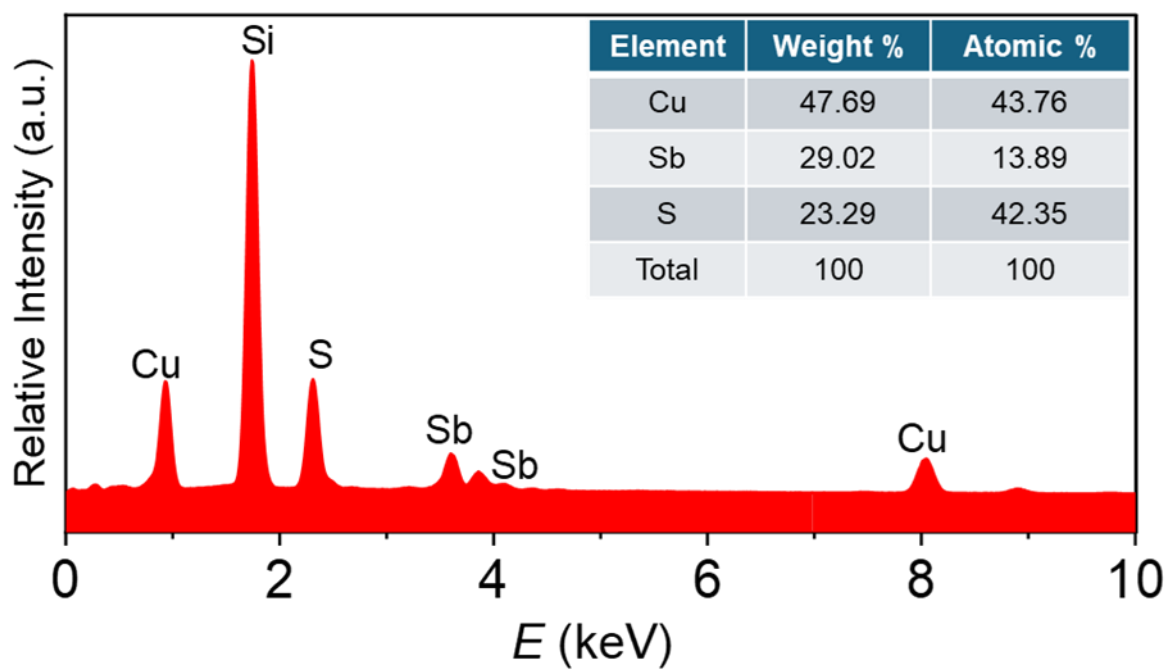

**Fig. S3** EDX spectrum of nanocrystalline  $\text{Cu}_3\text{SbS}_3$ , with the corresponding elemental composition shown in the inset.

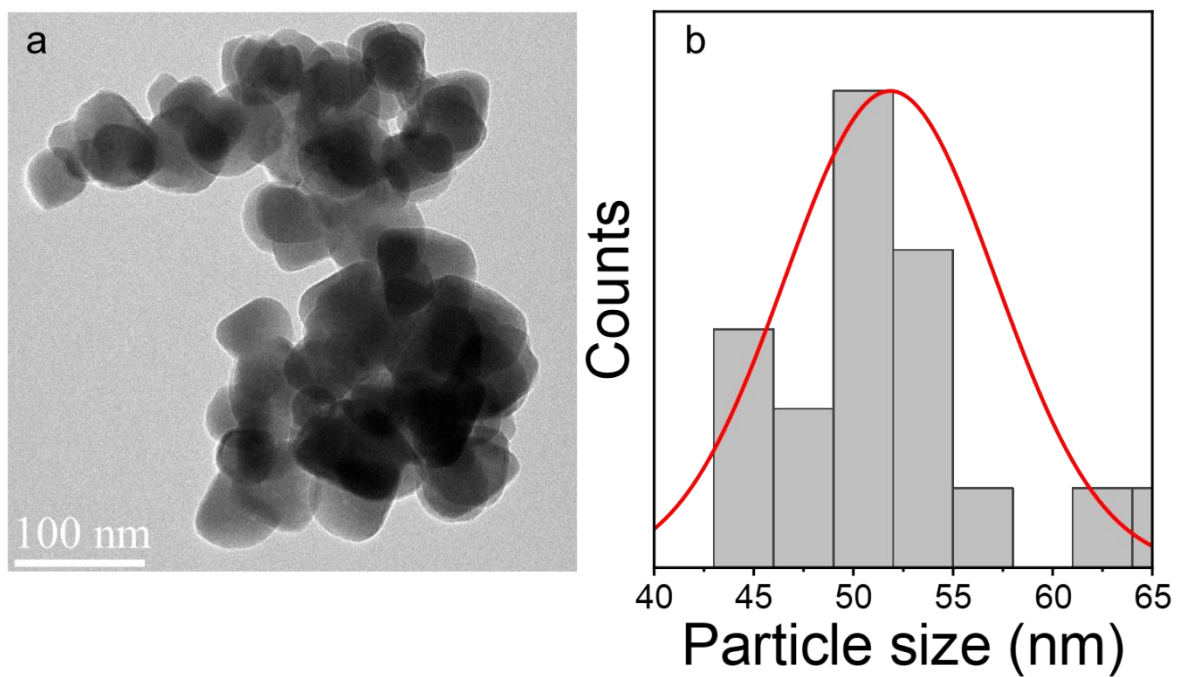

**Fig. S4** (a) Additional TEM image of  $\text{Cu}_3\text{SbS}_3$  nanocrystals and (b) the corresponding particle size distribution histogram.

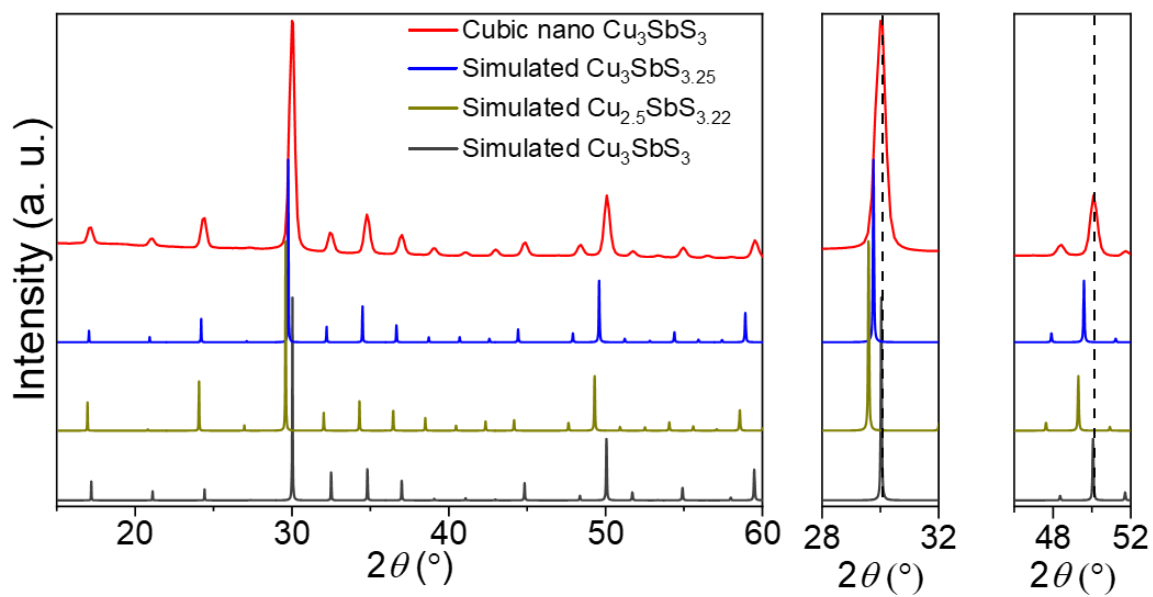

**Fig. S5** Room-temperature PXRD pattern of as-synthesised cubic nanocrystalline  $\text{Cu}_3\text{SbS}_3$  compared with its simulated pattern, pristine tetrahedrite ( $\text{Cu}_3\text{SbS}_{3.25}$ ) and defect-stabilised tetrahedrite ( $\text{Cu}_3\text{SbS}_{3.22}$ ) which indicates as-synthesised phase matches well with cubic  $\text{Cu}_3\text{SbS}_3$ .

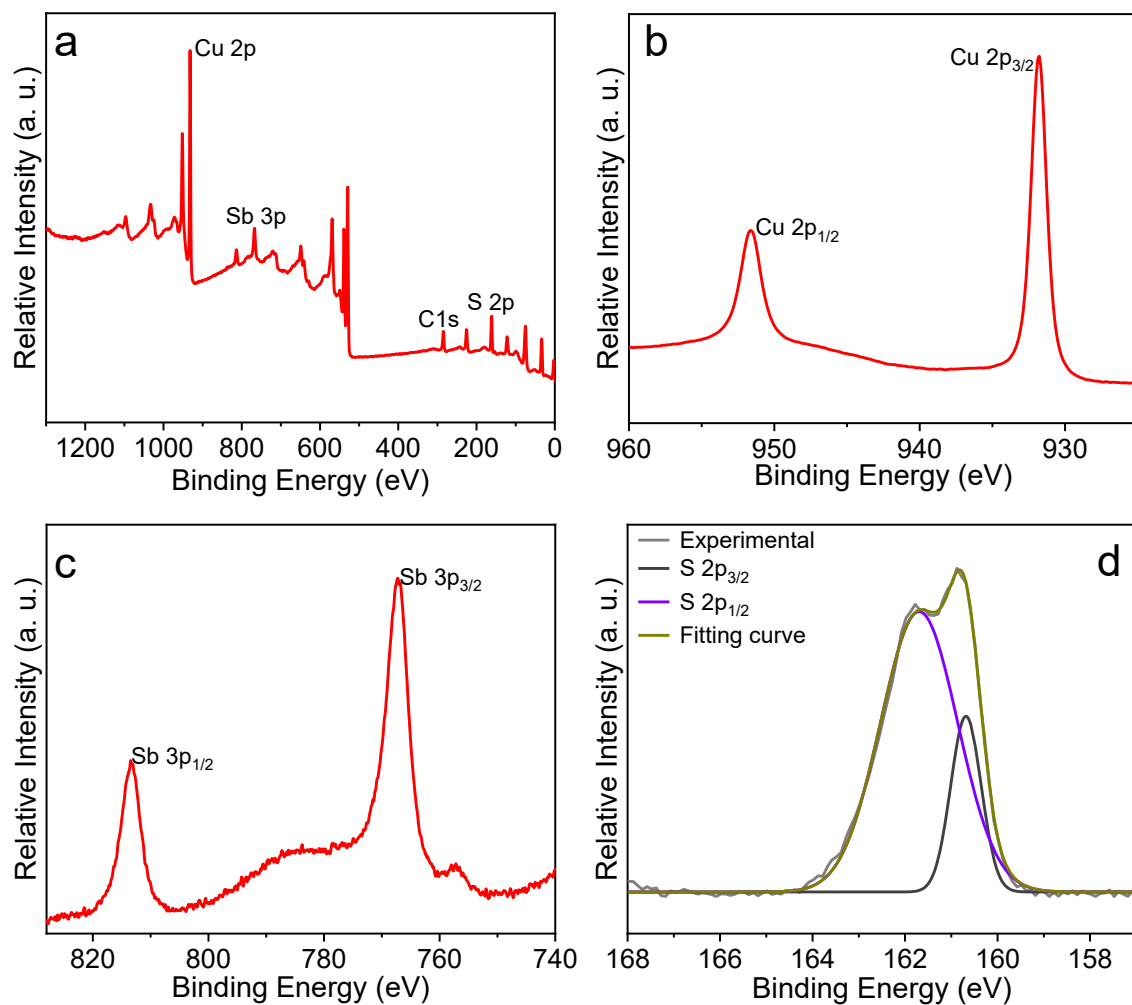

**Fig. S6** XPS spectra of as-synthesised  $\text{Cu}_3\text{SbS}_3$  nanocrystals: (a) survey scan, (b) Cu 2p, (c) Sb 3p, and (d) S 2p spectra. The doublet of S 2p has been fitted using a Gaussian model with an excellent goodness of fit ( $R^2$ ) value of 0.998.

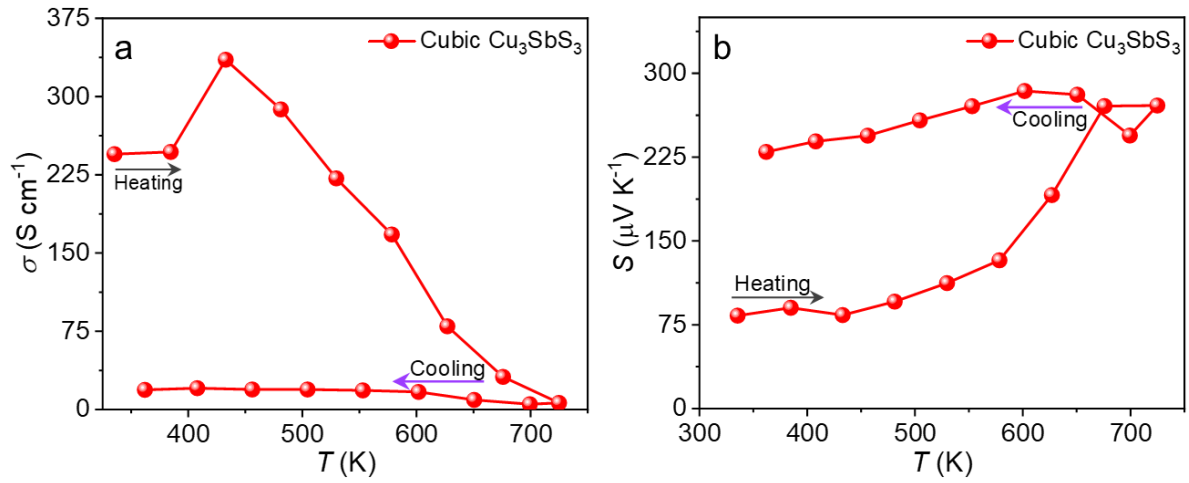

**Fig. S7** Temperature-dependent (a) electrical conductivity, and (b) Seebeck coefficient of nanocrystalline  $\text{Cu}_3\text{SbS}_3$  during a heating-cooling cycle, showing an irreversible nature.

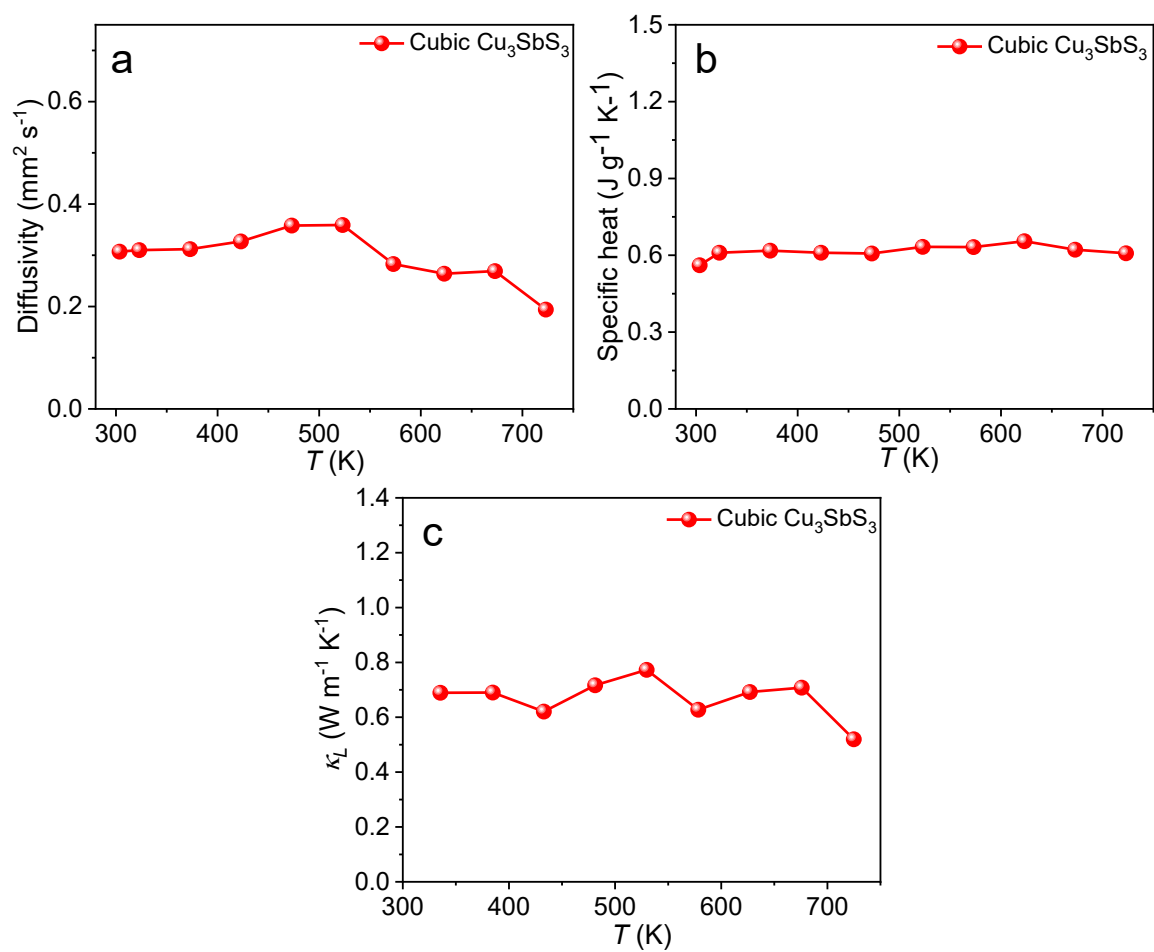

**Fig. S8** Temperature-dependent (a) thermal diffusivity, (b) Specific heat capacity ( $C_p$ ), (c) lattice thermal conductivity ( $\kappa_L$ ),  $C_p$  estimated using Dulong-Petit limit is  $\sim 0.427 \text{ J g}^{-1} \text{ K}^{-1}$ .

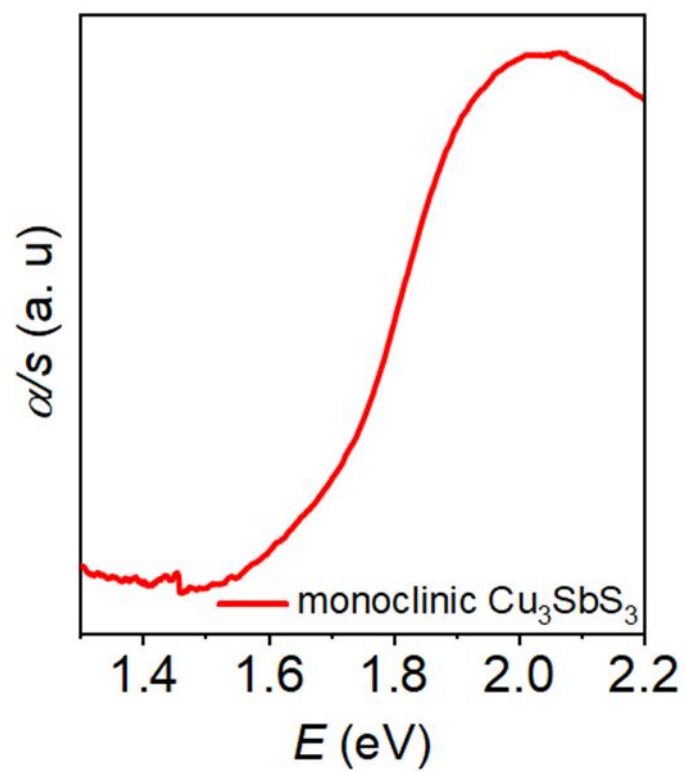

**Fig. S9** Optical absorption spectra of monoclinic bulk  $\text{Cu}_3\text{SbS}_3$  measured at room temperature.

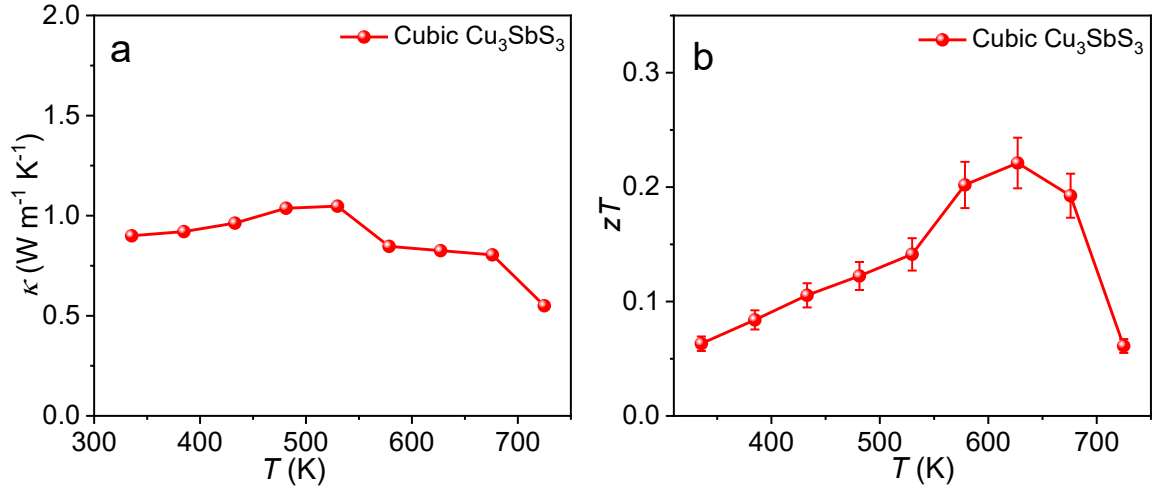

**Fig. S10** Temperature-dependent (a) thermal conductivity ( $\kappa_L$ ), (b) thermoelectric figure of merit ( $zT$ ) of nanocrystalline  $\text{Cu}_3\text{SbS}_3$  after porosity correction.

Since the sample have  $\sim 90\%$  of the theoretical density, we have also performed the porosity correction to correct the  $\kappa$  value using the formula given below:<sup>5</sup>

$$\kappa_m/\kappa = (1 - \varphi) (1 + \varphi / 2)$$

$\kappa$  – Porosity corrected thermal conductivity

$\kappa_m$  – Uncorrected measured thermal conductivity

$\varphi$  - Porosity taken from percentage density,

Here  $\varphi = 0.1$  (as measured density is 90%)

**Table S2** Crystallite size determination using Scherrer analysis

| <b>Peak position <math>2\theta</math> (°)</b> | <b>FWHM <math>\beta</math> (rad)</b> | <b>Crystallite size <math>D</math> (nm)</b> | <b>Average <math>D</math> (nm)</b> |
|-----------------------------------------------|--------------------------------------|---------------------------------------------|------------------------------------|
| 24.40                                         | 0.00343                              | 43.21                                       | 34.95                              |
| 29.98                                         | 0.00413                              | 36.28                                       |                                    |
| 34.75                                         | 0.00433                              | 35.02                                       |                                    |
| 36.92                                         | 0.00414                              | 36.89                                       |                                    |
| 49.92                                         | 0.00536                              | 29.78                                       |                                    |
| 59.30                                         | 0.00584                              | 28.52                                       |                                    |
| 32.44                                         | 0.00431                              | 34.95                                       |                                    |

**Table S3:** Thermal conductivity with porosity correction

| Temperature (K) | $\kappa_m$ (W m <sup>-1</sup> K <sup>-1</sup> ) | $\kappa_m$ (W m <sup>-1</sup> K <sup>-1</sup> ) | Porosity corrected $zT$ | $zT$ |
|-----------------|-------------------------------------------------|-------------------------------------------------|-------------------------|------|
| 335             | 0.85                                            | 0.89                                            | 0.06                    | 0.06 |
| 384             | 0.87                                            | 0.92                                            | 0.08                    | 0.08 |
| 432             | 0.91                                            | 0.96                                            | 0.10                    | 0.11 |
| 481             | 0.98                                            | 1.03                                            | 0.12                    | 0.12 |
| 529             | 0.99                                            | 1.04                                            | 0.14                    | 0.14 |
| 578             | 0.8                                             | 0.84                                            | 0.20                    | 0.21 |
| 627             | 0.78                                            | 0.82                                            | 0.22                    | 0.23 |
| 675             | 0.76                                            | 0.80                                            | 0.19                    | 0.20 |
| 724             | 0.52                                            | 0.55                                            | 0.06                    | 0.06 |

**Table S4:**  $zT$  comparison table

| <b>Composition</b>                                                             | <b><math>zT</math></b> | <b>Temperature (K)</b> | <b>Reference</b> |
|--------------------------------------------------------------------------------|------------------------|------------------------|------------------|
| $\text{Cu}_3\text{SbS}_3$                                                      | 0.23                   | 627                    | This work        |
| Fe doped $\text{Cu}_3\text{SbS}_3$                                             | 0.70                   | 550-625                | 6                |
| Tetrahedrite                                                                   | 0.52                   | 600                    | 7                |
| $\text{Mg}_{3.2-x}\text{Ce}_x\text{SbBi}_{0.97}\text{Te}_{0.03}$ ( $x= 0.02$ ) | 1.52                   | 723                    | 8                |
| TlCuS                                                                          | 1                      | 573                    | 9                |
| $\text{Bi}_{13}\text{S}_{18}\text{Br}_2$                                       | 1                      | 748                    | 10               |

## References

1. J. Rodríguez-Carvajal, J. González-Platas and N. A. Katcho, *Acta Crystallogr., Sect. B*, 2025, **81**, 302–317.
2. A. Sarkar, M. Chakrabarti, S. K. Ray, D. Bhowmick and D. Sanyal, *J. Phys.: Condens. Matter*, 2011, **23**, 155801.
3. H. Luitel, A. Sarkar, M. Chakrabarti, S. Chattopadhyay, K. Asokan and D. Sanyal, *Nucl. Instrum. Methods Phys. Res., Sect. B*, 2016, **379**, 215–218.
4. K. G. Lynn and A. N. Goland, *Solid State Commun.*, 1976, **18**, 1549–1552.
5. D. A. Ferluccio, J. E. Halpin, K. L. MacIntosh, R. J. Quinn, E. Don, R. I. Smith, D. A. MacLaren and J.-W. G. Bos, *J. Mater. Chem. C*, 2019, **7**, 6539–6547.
6. B. Du, R. Zhang, M. Liu, K. Chen, H. Zhang and M. J. Reece, *J. Mater. Chem. C*, 2019, **7**, 394.
7. D. P. Weller and D. T. Morelli, *Front. Electron. Mater.*, 2022, **2**, 913280.
8. L. Zhai, H. Liu, L. Su, Y. Kuang, F. Chen, Y. Zhang, W. Fan and Z. Sun, *Energy Environ. Mater.*, 2025, **8**, e70066
9. A. Bhui, P. V. D. Matukumilli, S. Biswas, A. Ahad, A. Ghata, D. Rawat, M. Dutta, A. Soni, U. V. Waghmare and K. Biswas, *J. Am. Chem. Soc.*, 2025, **147**, 3758–3768.
10. A. Das, K. Debnath, I. Maria, S. Das, P. Dutta, D. Swain, U. V. Waghmare and K. Biswas, *J. Am. Chem. Soc.*, 2024, **146**, 30518–30528.
